# Supplementary material
Source: Springer Nature journal article supplement (https://www.springermedizin.de/resource/supplementary/12879_2010_1621_MOESM4_ESM.pdf/9442916)
Supplement: MOESM4 [file 9442916]

Acid-fast bacilli concentration change after  
bleach-sedimentation (mean +/- SEM)

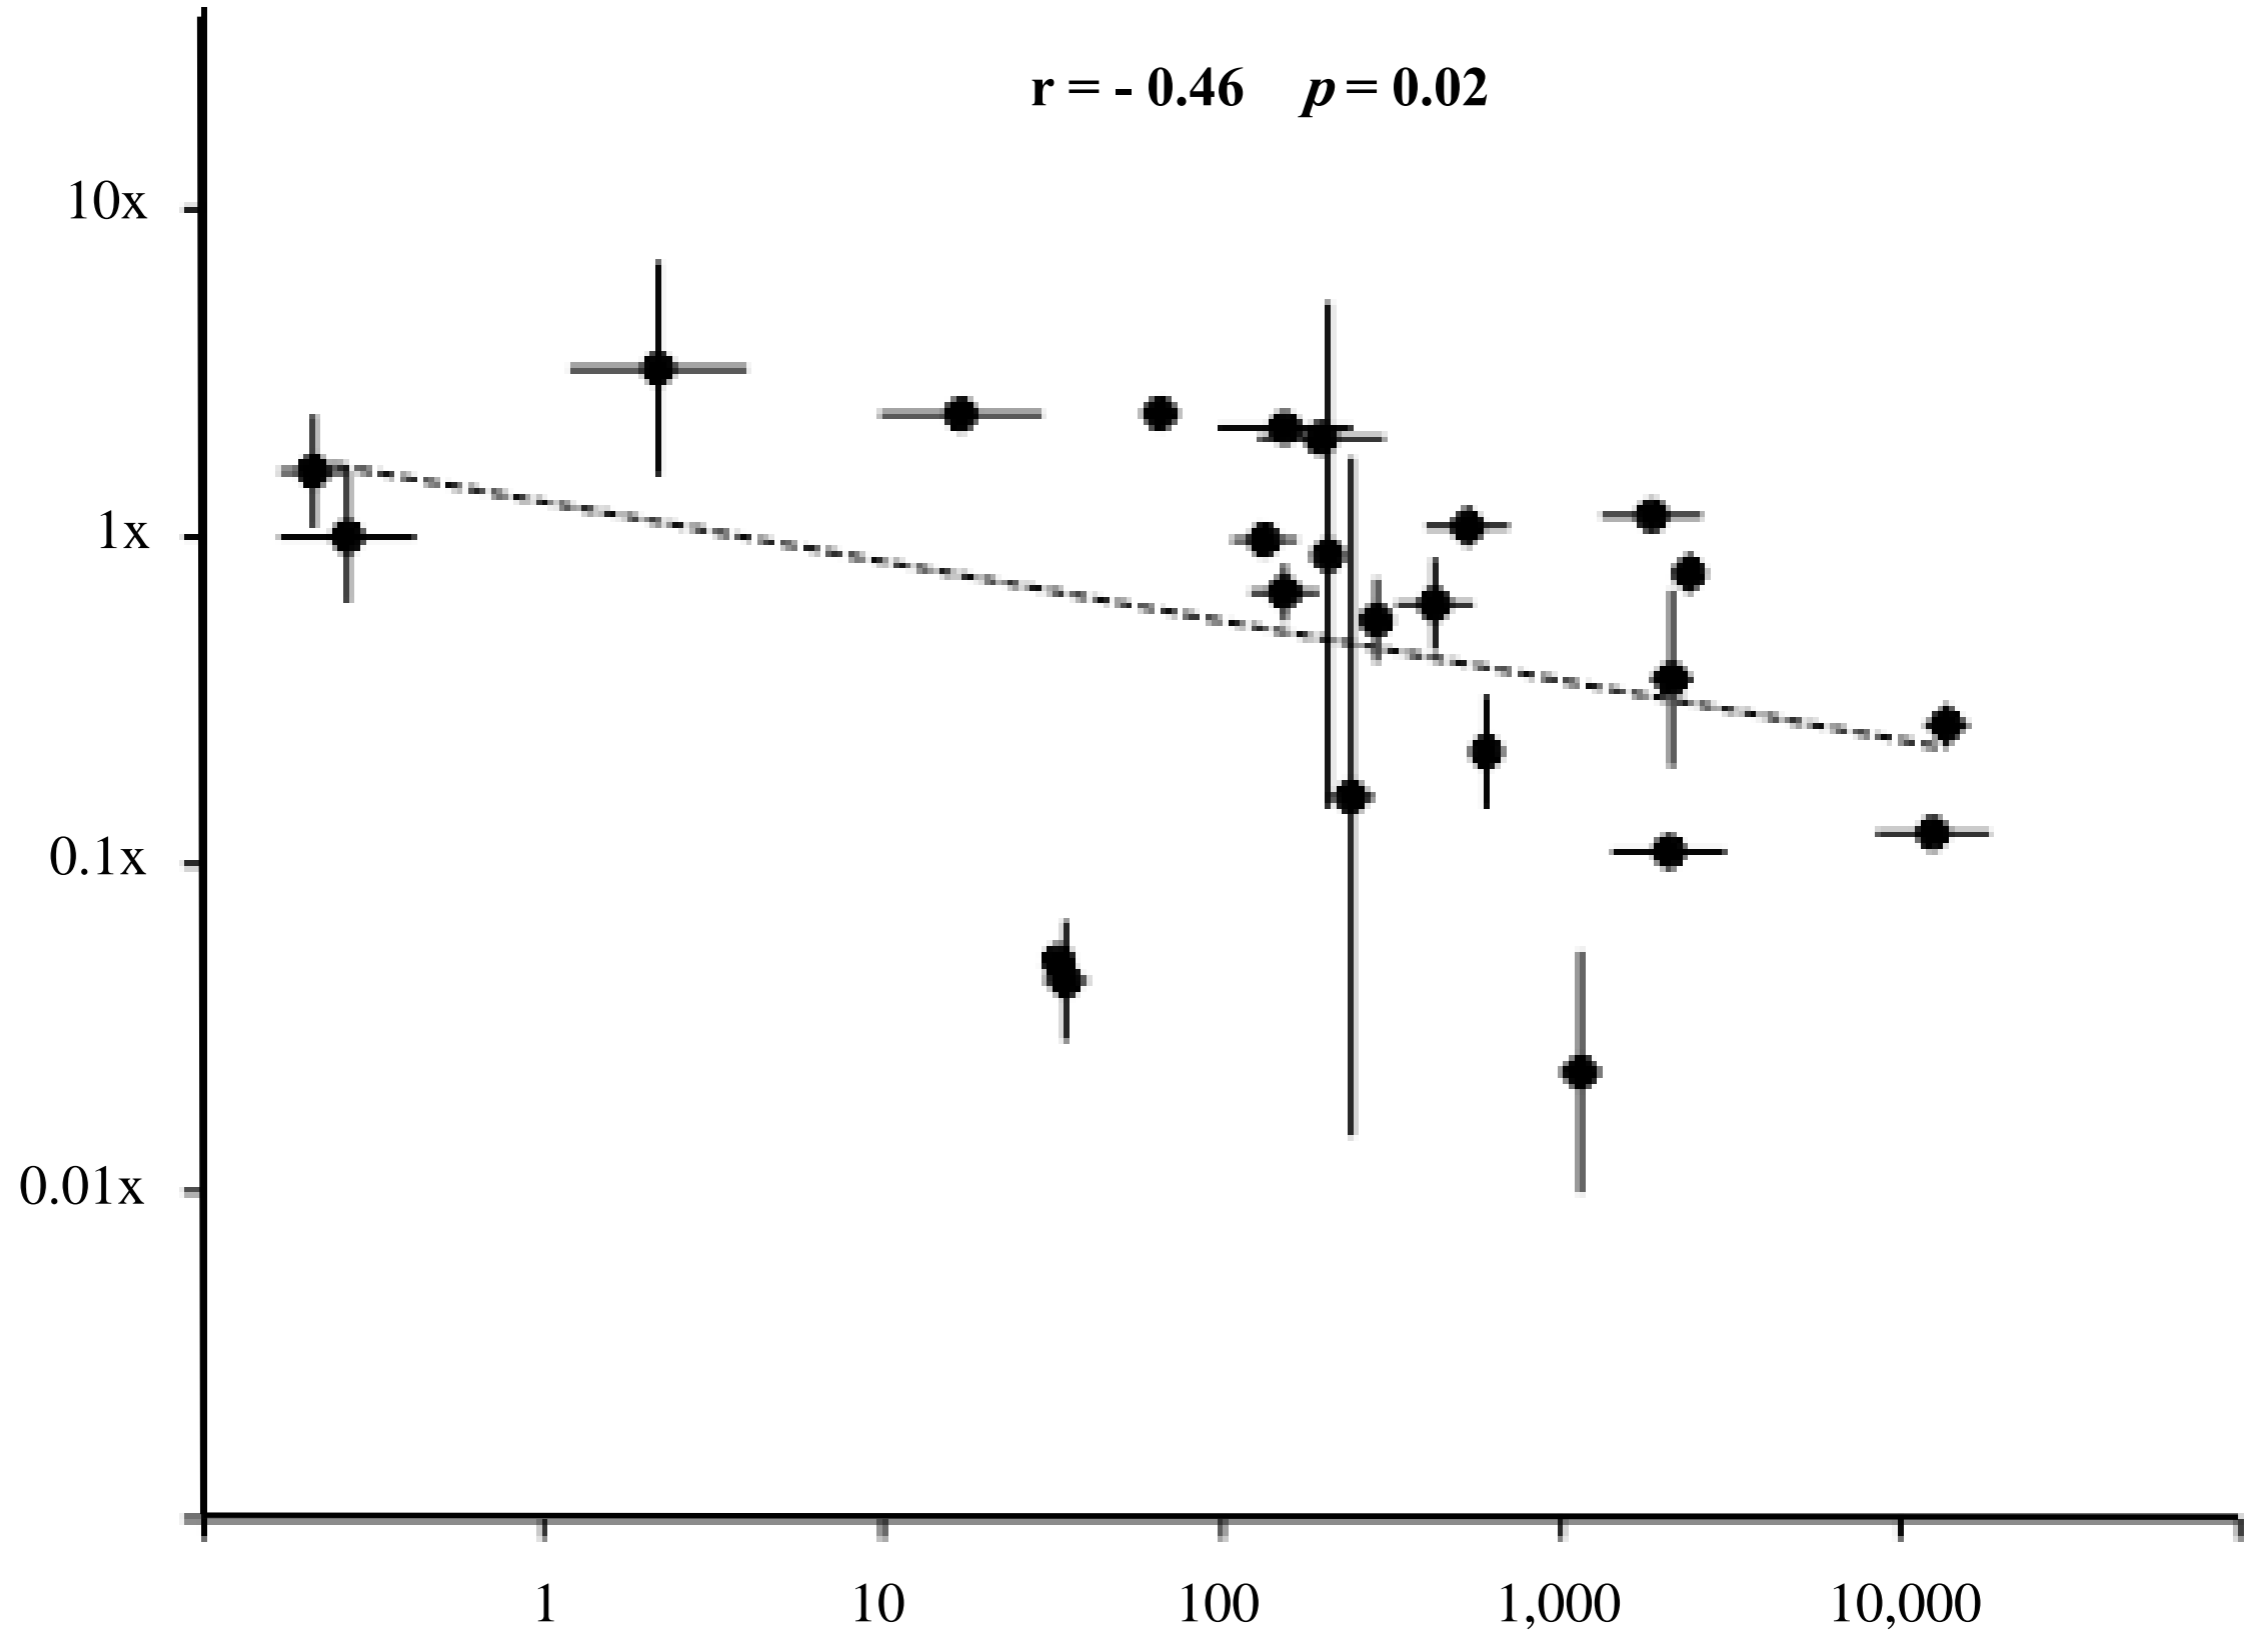

|   |     |   |    |     |
|---|-----|---|----|-----|
| 0 | +/- | + | ++ | +++ |
|---|-----|---|----|-----|

Acid-fast bacilli per 100 microscopy fields in conventional smears (mean +/- SEM)
